# Supplementary material
Source: PubMed Central journal article supplement (PMC4670267)
Supplement: NIHMS737204-supplement-7.pdf [file NIHMS737204-supplement-7.pdf]

**A**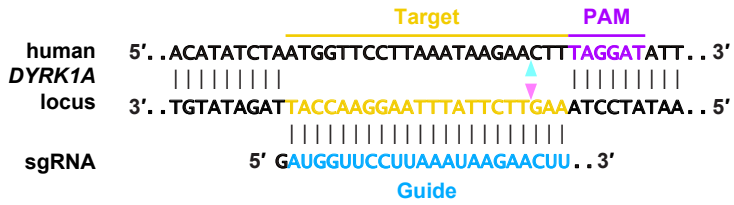**B**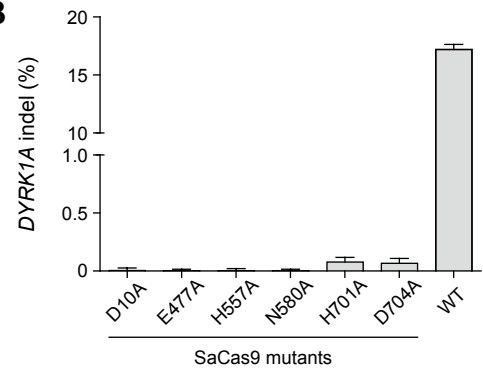**C**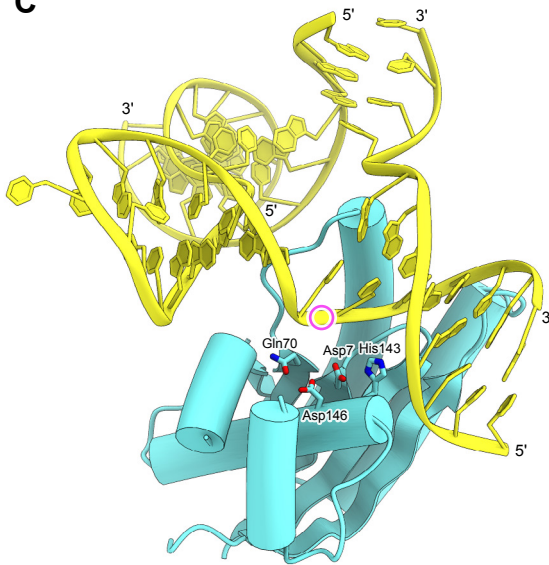

*T. thermophilus* RuvC–substrate DNA  
(PDB ID 4LD0)

**D**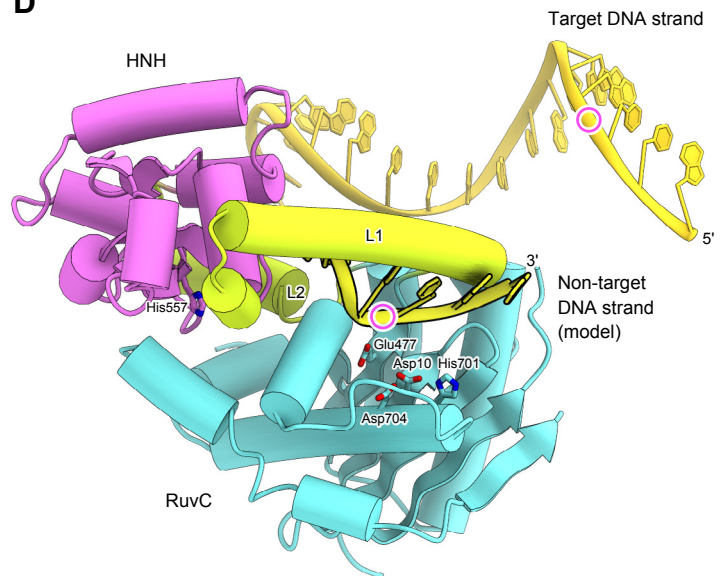

SaCas9–sgRNA–target DNA–non-target DNA  
(model)

# Figure S7
