# Supplementary material
Source: PubMed Central journal article supplement (PMC4670267)

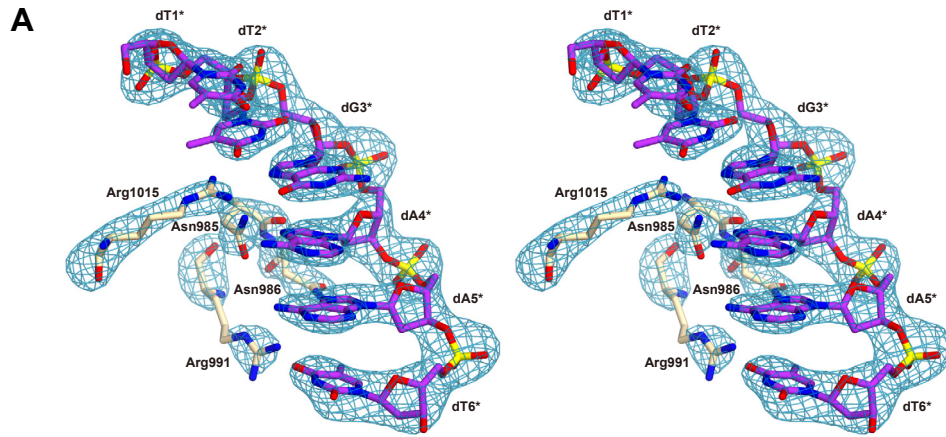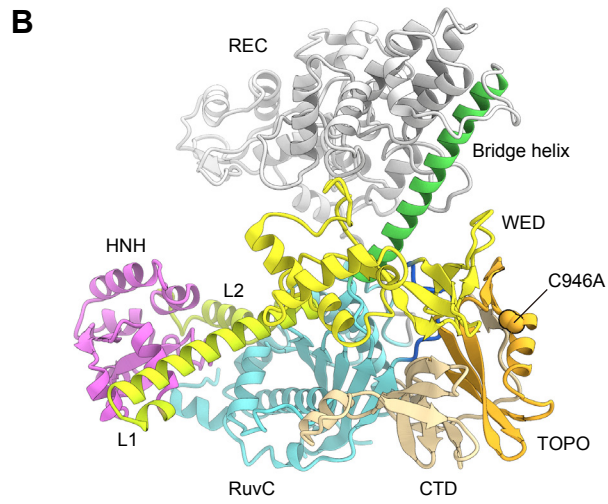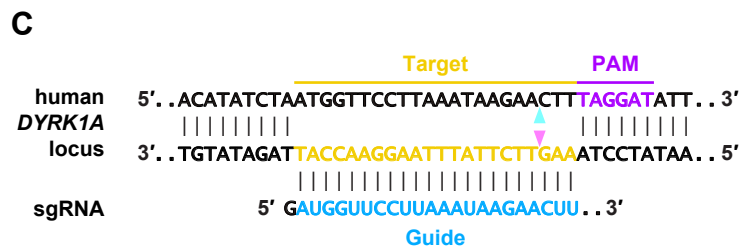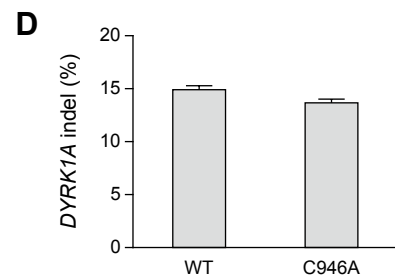

**Figure S1**

Supplement: NIHMS737204-supplement-1.pdf [file NIHMS737204-supplement-1.pdf]

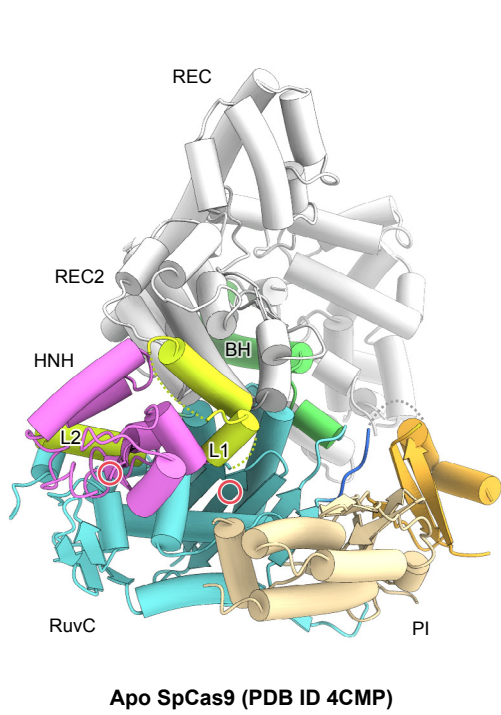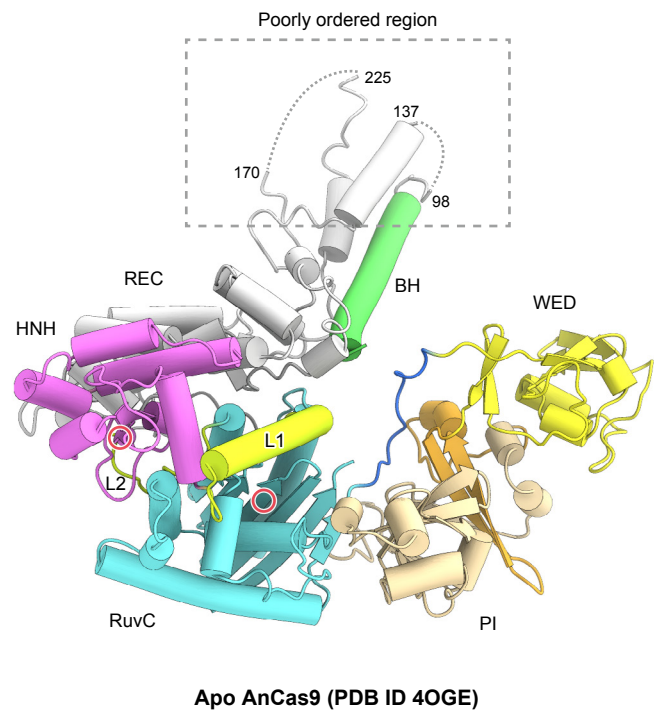

**Figure S2**

Supplement: NIHMS737204-supplement-2.pdf [file NIHMS737204-supplement-2.pdf]

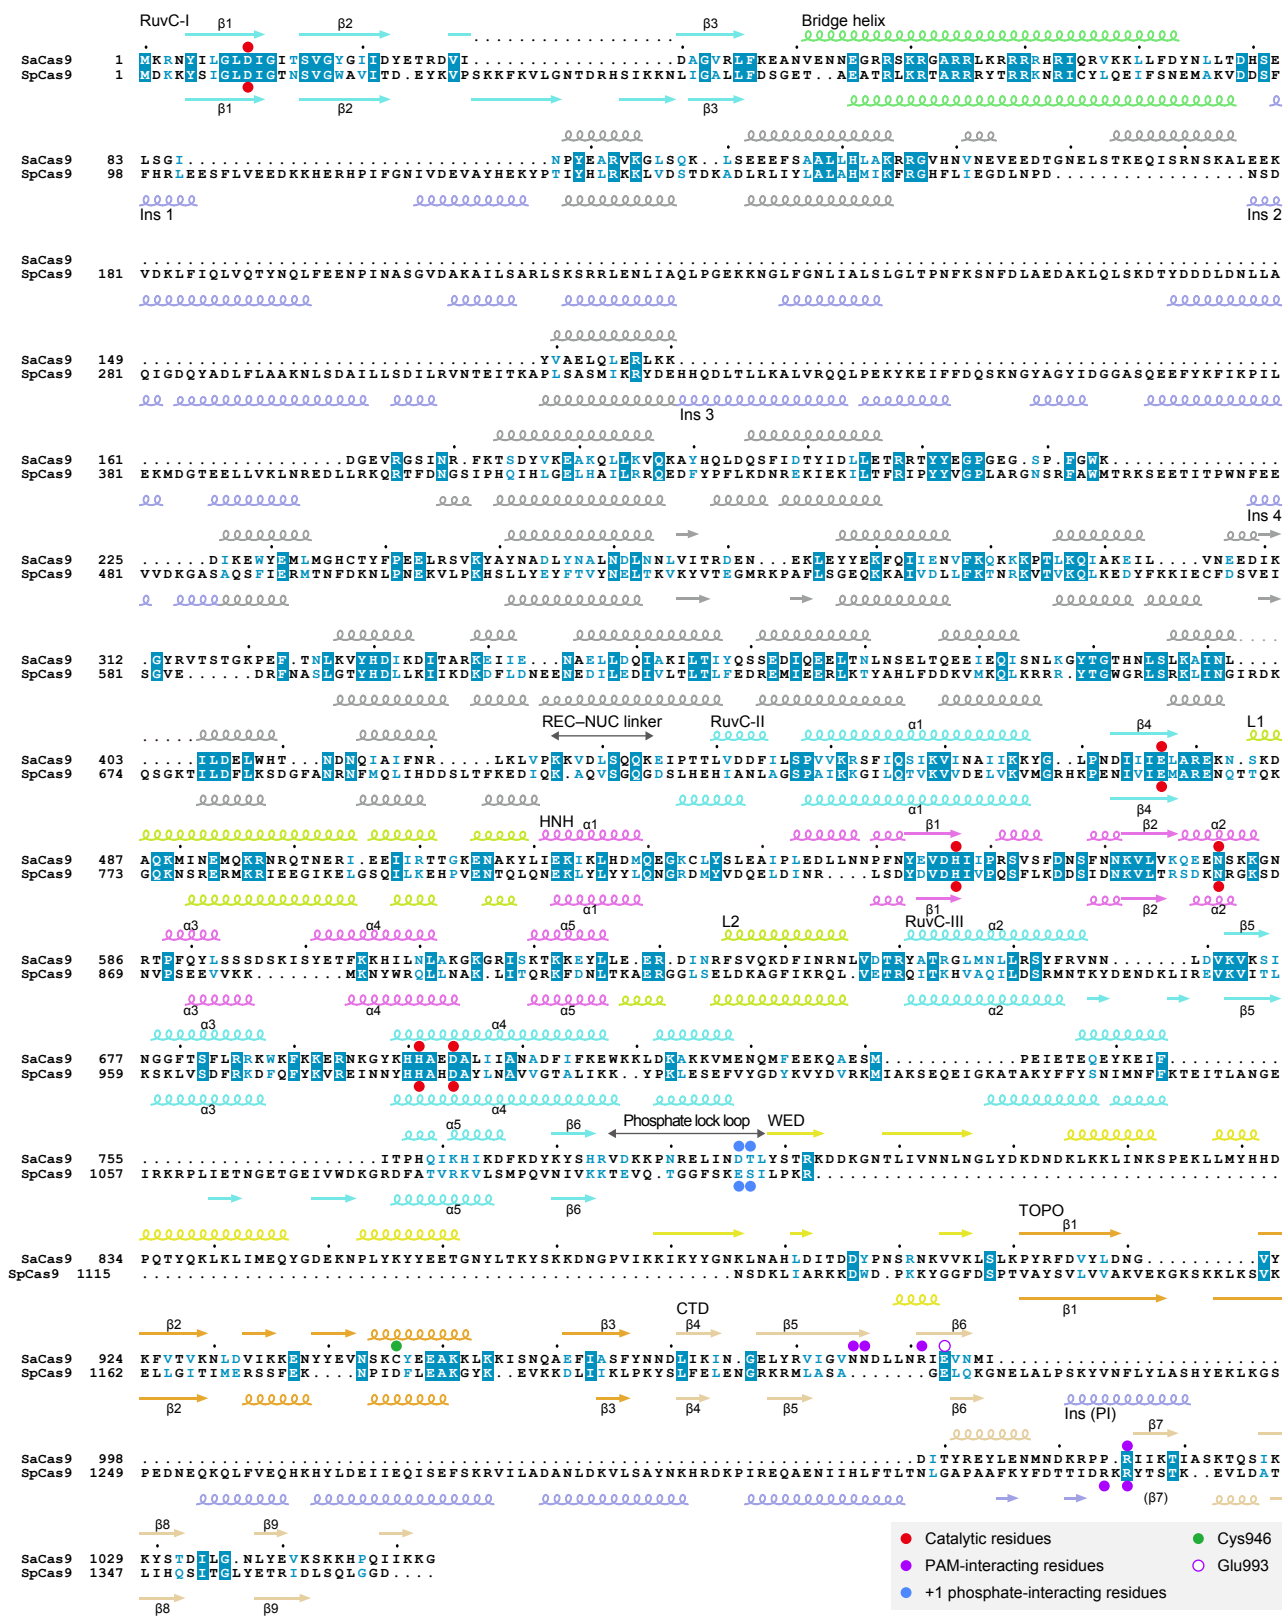

# Figure S3

Supplement: NIHMS737204-supplement-3.pdf [file NIHMS737204-supplement-3.pdf]

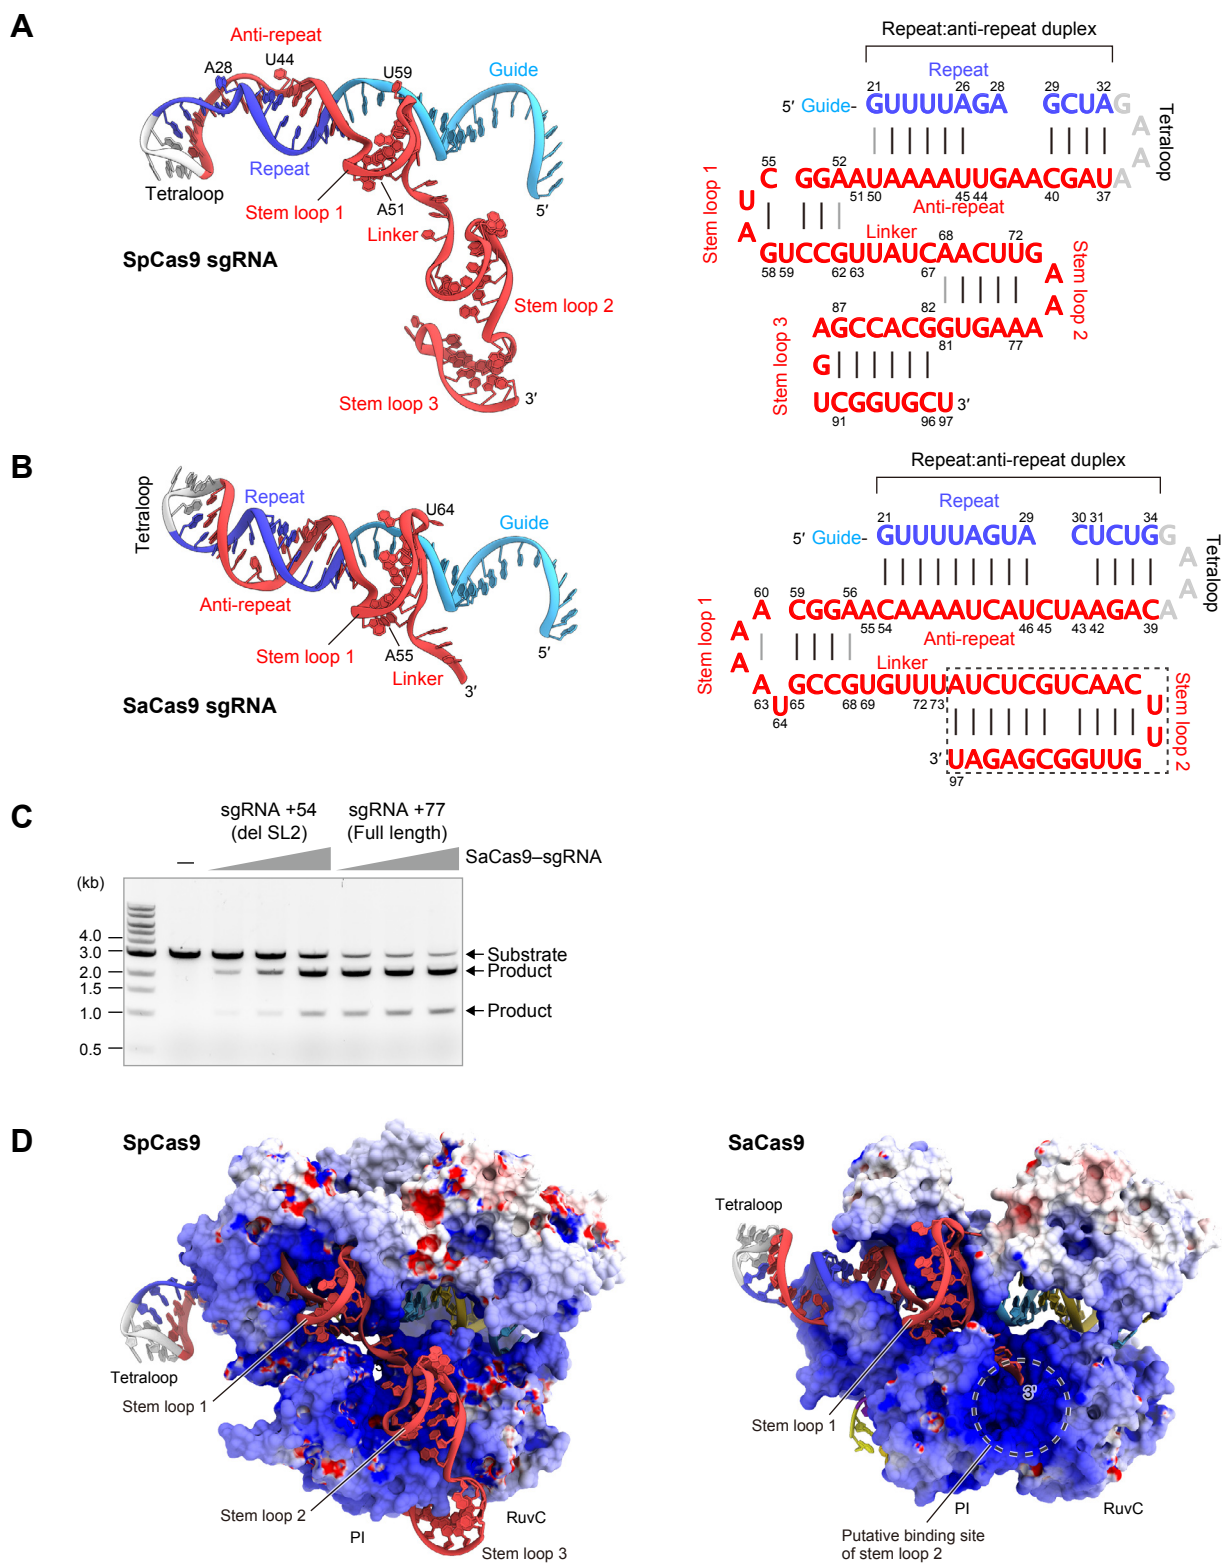

**Figure S4**

Supplement: NIHMS737204-supplement-4.pdf [file NIHMS737204-supplement-4.pdf]

**A**

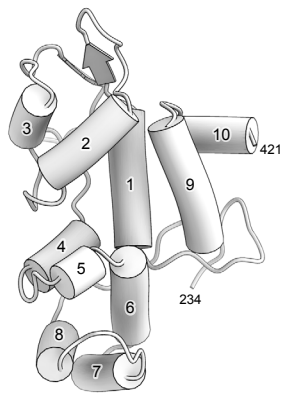

**SaCas9**

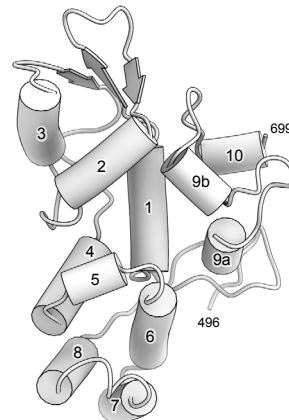

**SpCas9**

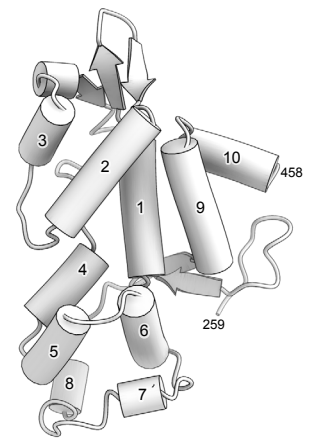

**AnCas9**

**B**

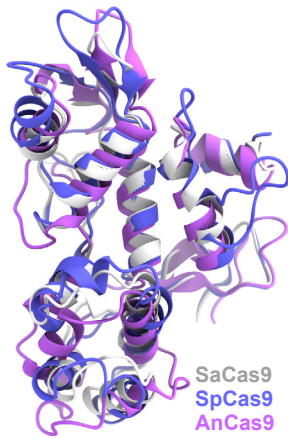

SaCas9  
SpCas9  
AnCas9

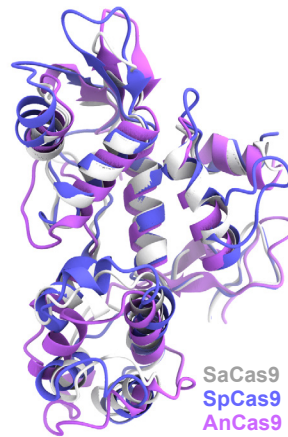

SaCas9  
SpCas9  
AnCas9

**Figure S5**

Supplement: NIHMS737204-supplement-5.pdf [file NIHMS737204-supplement-5.pdf]

**A**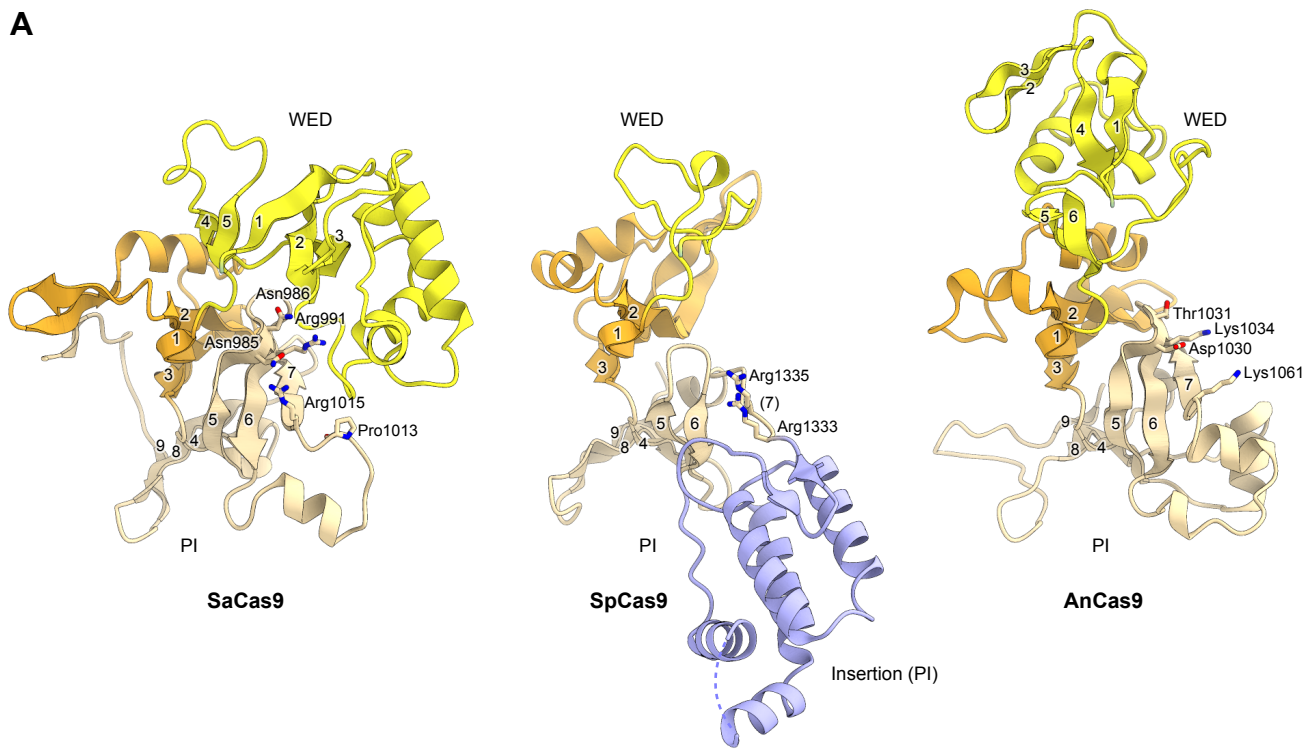**B**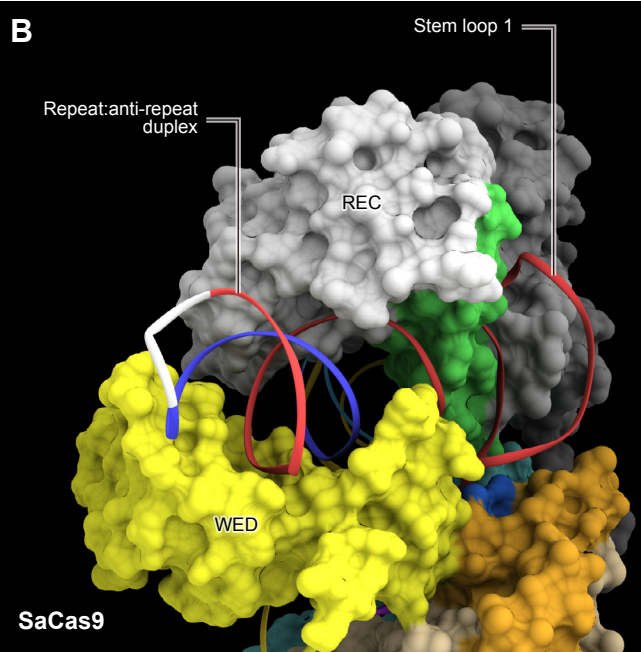**C**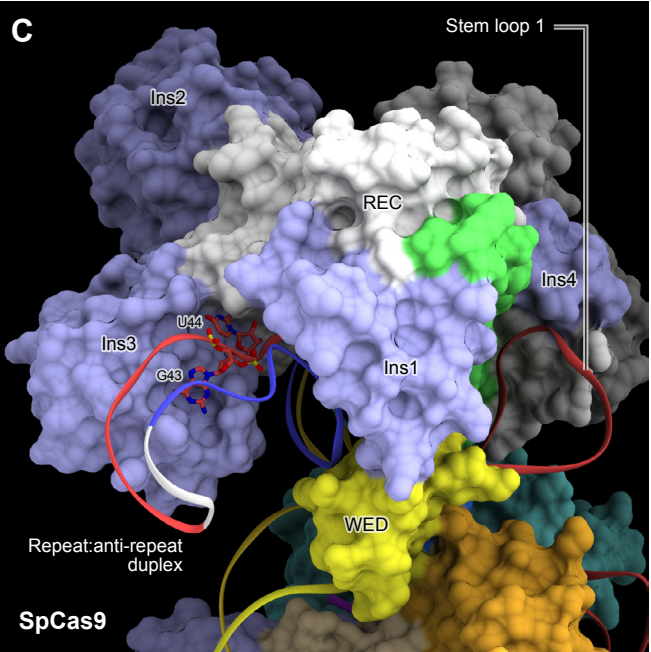**Figure S6**

Supplement: NIHMS737204-supplement-6.pdf [file NIHMS737204-supplement-6.pdf]
